# Supplementary material for: Iron phthalocyanine integrated with boron-doped reduced graphene oxide for highly selective four-electron oxygen reduction: an experimental study
Source: Royal Society of Chemistry journal article supplement (doi:10.1039/d3ma00975k), 2024-01-01
Supplement: d3ma00975k1.pdf [file d3ma00975k1.pdf]

*Electronic Supplementary Information (ESI)†*

**Iron phthalocyanine integrated with boron-doped reduced graphene oxide for the highly selective four-electron oxygen reduction: An experimental study**

**Vikram Rathour,<sup>1</sup> Smita Singh,<sup>1</sup> Varsha Singh,<sup>1</sup> Devesh Kumar Singh,<sup>2</sup> Mamta Yadav,<sup>1</sup>**

**Ananya Tiwari,<sup>1</sup> and Vellaichamy Ganesan<sup>\*1</sup>**

1: Department of Chemistry, Institute of Science, Banaras Hindu University, Varanasi-221005,  
UP, India

2. Kutir Post Graduate College, Chakkey, Jaunpur-222146, UP, India

E-mail: velganes@yaho.com and velgan@bhu.ac.in

**\*Corresponding author**

## Experimental section

### Chemicals

Graphite flakes were purchased from Sigma-Aldrich, India. Boric acid ( $\text{H}_3\text{BO}_3$ ), ethanol ( $\text{C}_2\text{H}_5\text{OH}$ ), and potassium permanganate ( $\text{KMnO}_4$ ) were purchased from Qualigens. Potassium hydroxide ( $\text{KOH}$ ) and methanol were obtained from SRL. Sulfuric acid ( $\text{H}_2\text{SO}_4$ ), orthophosphoric acid ( $\text{H}_3\text{PO}_4$ ), and *N, N* dimethylformamide (DMF) were purchased from S.D Fine Chemicals (India). Hydrogen peroxide ( $\text{H}_2\text{O}_2$ ) was purchased from Merck, India.

### Instrumentation

All electrochemical studies were done on CH Instruments (CHI-660C), USA and Squidstat potentiostats (Admiral Instruments, USA) with a three-electrode system. Glassy carbon rotating disc electrode ( $\text{GC}_{\text{RDE}}$ ) is used as a working electrode for the study of activity and the kinetics of ORR. Rotating ring disc electrode with glassy carbon disc and gold ring ( $\text{GC}_{\text{RRDE}}$ ) is used to study the four-electron selectivity of the materials. The surface area of  $\text{GC}_{\text{RDE}}$  is  $0.196 \text{ cm}^2$  and the area of the disc and ring of  $\text{GC}_{\text{RRDE}}$  is  $0.238$  and  $0.236 \text{ cm}^2$ , respectively. (The disc diameter of  $\text{GC}_{\text{RRDE}}$  is  $5.5 \text{ mm}$  and the ring's outer and inner diameters are  $8.5$  and  $6.5 \text{ mm}$ .) A saturated calomel electrode (SCE) is used as a reference electrode. A platinum wire and  $0.1 \text{ M KOH}$  ( $\text{pH} = 13$ ) are used as a counter electrode and the electrolyte, respectively. Powder X-ray diffraction (XRD) patterns were obtained from Bruker D8 Advance X-ray diffractometer using  $\text{Cu-} \alpha$  radiation ( $0.1541 \text{ nm}$ ) with a scan rate of  $2$  degrees per minute. Raman spectroscopy studies were done on Renishaw micro-Raman spectroscope using a (50%)  $532 \text{ nm}$  solid-state diode laser source in the range of  $500\text{-}3000 \text{ cm}^{-1}$ . FT-IR spectra were recorded over the range of  $400\text{-}4000 \text{ cm}^{-1}$  on a Perkin Elmer spectrophotometer using the KBr pellet method. Transmission electron

microscopy (TEM) images were captured from a TECNAI 20 G<sup>2</sup> microscope operated at 200 kV. Scanning electron microscopy (SEM) images with energy dispersive X-ray (EDAX) elemental mapping analyses were carried out by SEM VEGA 3TESCAN and operated at 30 kV. X-ray photoelectron spectroscopy (XPS) data of different elements were recorded on Physical Electronics, PHI 5000VersaProbe III. The formulas used are given in Equations S1 and S2.

$$E_{\text{RHE}} = E_{\text{SCE}} + 0.059 \times \text{pH} + 0.241 \text{ V} \quad \dots(\text{S1})$$

(To convert the observed potentials with respect to a reversible hydrogen electrode (RHE) scale)

The Koutecky-Levich (K-L) equation is as follows

$$j^{-1} = j_{\text{K}}^{-1} + j_{\text{L}}^{-1} = \omega^{-1/2} B^{-1} + j_{\text{K}}^{-1} \quad \dots(\text{S2})$$

$j$  = observed current density,  $j_{\text{K}} = (kC_0nF)$  kinetic current density,  $\omega$  = angular rotation of the electrode,  $B = (0.62C_0nF\nu^{1/6}D^{2/3})$  = Levich constant. The other symbols have the usual meaning and are produced from literature.<sup>1</sup>

To calculate the number of electrons and percentage of H<sub>2</sub>O<sub>2</sub> produced using the RRDE experiment (Equations S3 and S4) disk electrode was scanned in the potential of ORR region (1.1 to 0.2 V vs RHE) and the disk current is denoted as ( $I_{\text{D}}$ ) and ring electrode was kept at 1.5 V vs RHE and ring current is denoted as  $I_{\text{R}}$ . The collection efficiency ( $N$ ) of the RRDE ring electrode is 0.3.<sup>2</sup>

$$\text{Number of electrons} = 4 \times I_{\text{D}} / (I_{\text{D}} + (I_{\text{R}}/N)) \quad \dots(\text{S3})$$

$$\% \text{ H}_2\text{O}_2 \text{ produced} = [(I_{\text{R}}/N) / (I_{\text{D}} + (I_{\text{R}}/N))] \times 200 \quad \dots(\text{S4})$$

## Synthesis of the materials

Graphene oxide (GO) was synthesized by the modified Hummers method. In this method, 1.0 g graphite powder was mixed with 6.0 g  $\text{KMnO}_4$  and ground with a mortar and pestle. In a 500 mL beaker, 120.0 mL of concentrated  $\text{H}_2\text{SO}_4$  was mixed with 13.0 mL of concentrated  $\text{H}_3\text{PO}_4$ . The first mixture of graphite and  $\text{KMnO}_4$  was slowly added to the beaker containing the acids and the temperature was maintained at 50 °C. The mixture was stirred magnetically for 4 h and then cooled to 3-5 °C using ice. To the ice-cold mixture, 5.0 mL  $\text{H}_2\text{O}_2$  was added very slowly with string. The mixture was centrifuged at 10000 rpm for a few min and the material was washed with water until the pH of the washings became 7.0. The residue, graphene oxide (GO) was collected and dried at 40 °C.<sup>3-4</sup> To prepare boron-doped reduced GO (B-RGO), 200.0 mg of boric acid is mixed with 50.0 mg of GO in a water-ethanol mixture (20.0, 8.0 mL respectively) and sonicated for 10 min and put in a Teflon-lined autoclave at 160 °C for 16 h. After cooling to room temperature, the materials were filtered and washed with ethanol and water.<sup>5,6</sup> Immobilization of FePc on B-RGO was achieved by mixing 50.0 mg B-RGO and 5.0 mg FePc in 20.0 mL DMF and equilibrating for 24 h by continuous magnetic stirring. The formed product (FePc@B-RGO) was washed with water and DMF and dried at room temperature. In a similar way, FePc@RGO was also prepared, however, replacing B-RGO with RGO. The suspensions (5 mg in 1.0 mL DMF, *i.e.*, 0.5 %) of RGO, B-RGO, FePc@RGO, FePc@B-RGO, and Pt/C in DMF were prepared and sonicated for 45 min to modify the electrodes. The cleaned electrodes were coated with the respective suspensions to get the respective material-modified electrodes. The catalyst loadings for  $\text{GC}_{\text{RDE}}$  and  $\text{GC}_{\text{RRDE}}$  are approximately the same ( $357 \mu\text{g}/\text{cm}^2$ ).

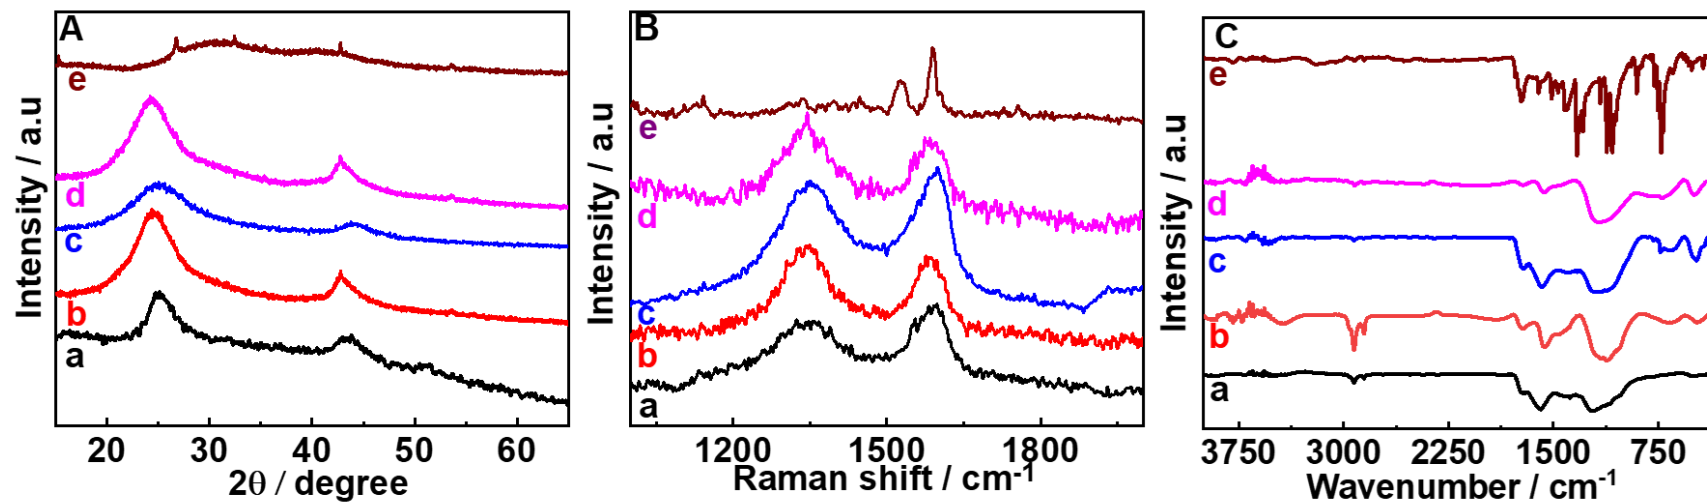

**Fig. S1** Powder XRD patterns (A), Raman spectra (B), and FT-IR spectra (C) of RGO (a), B-RGO (b), FePc@RGO (c), FePc@B-RGO (d), and FePc (e).

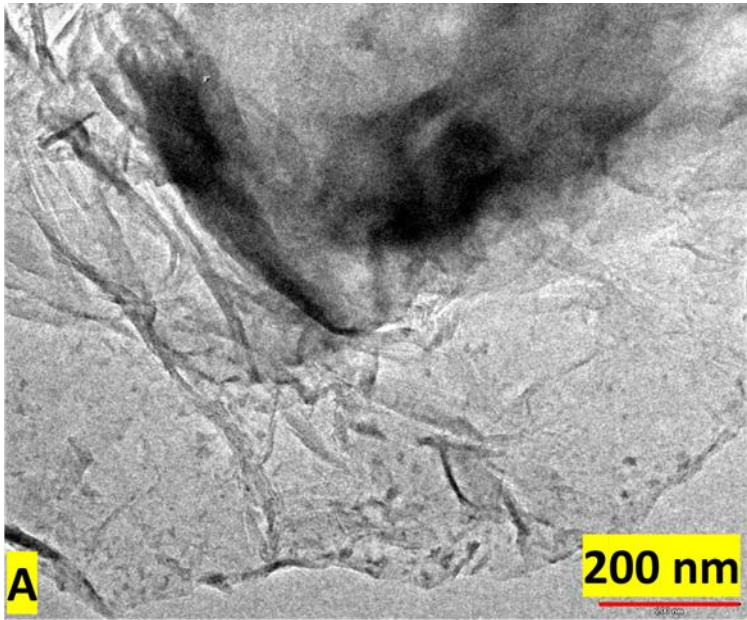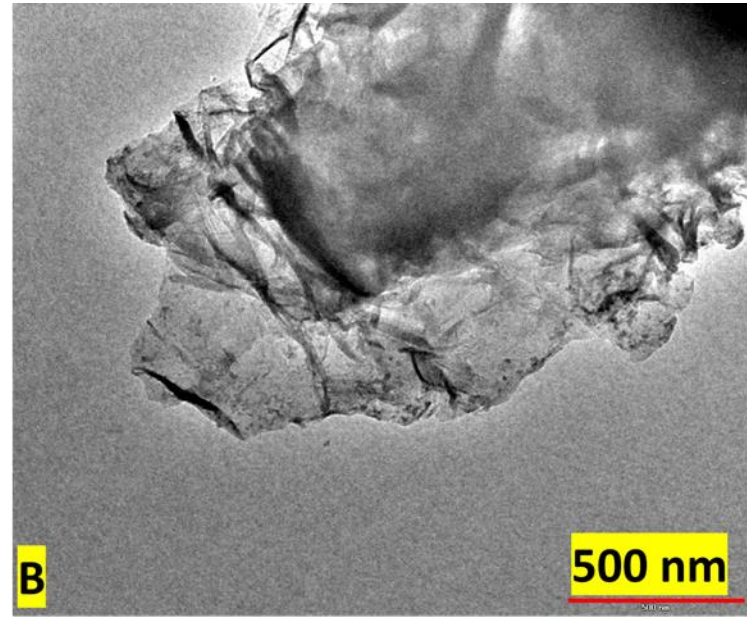

**Fig. S2** TEM images of FePc@B-RGO at different magnifications (scale: 200 nm (A) and 500 nm (B)).

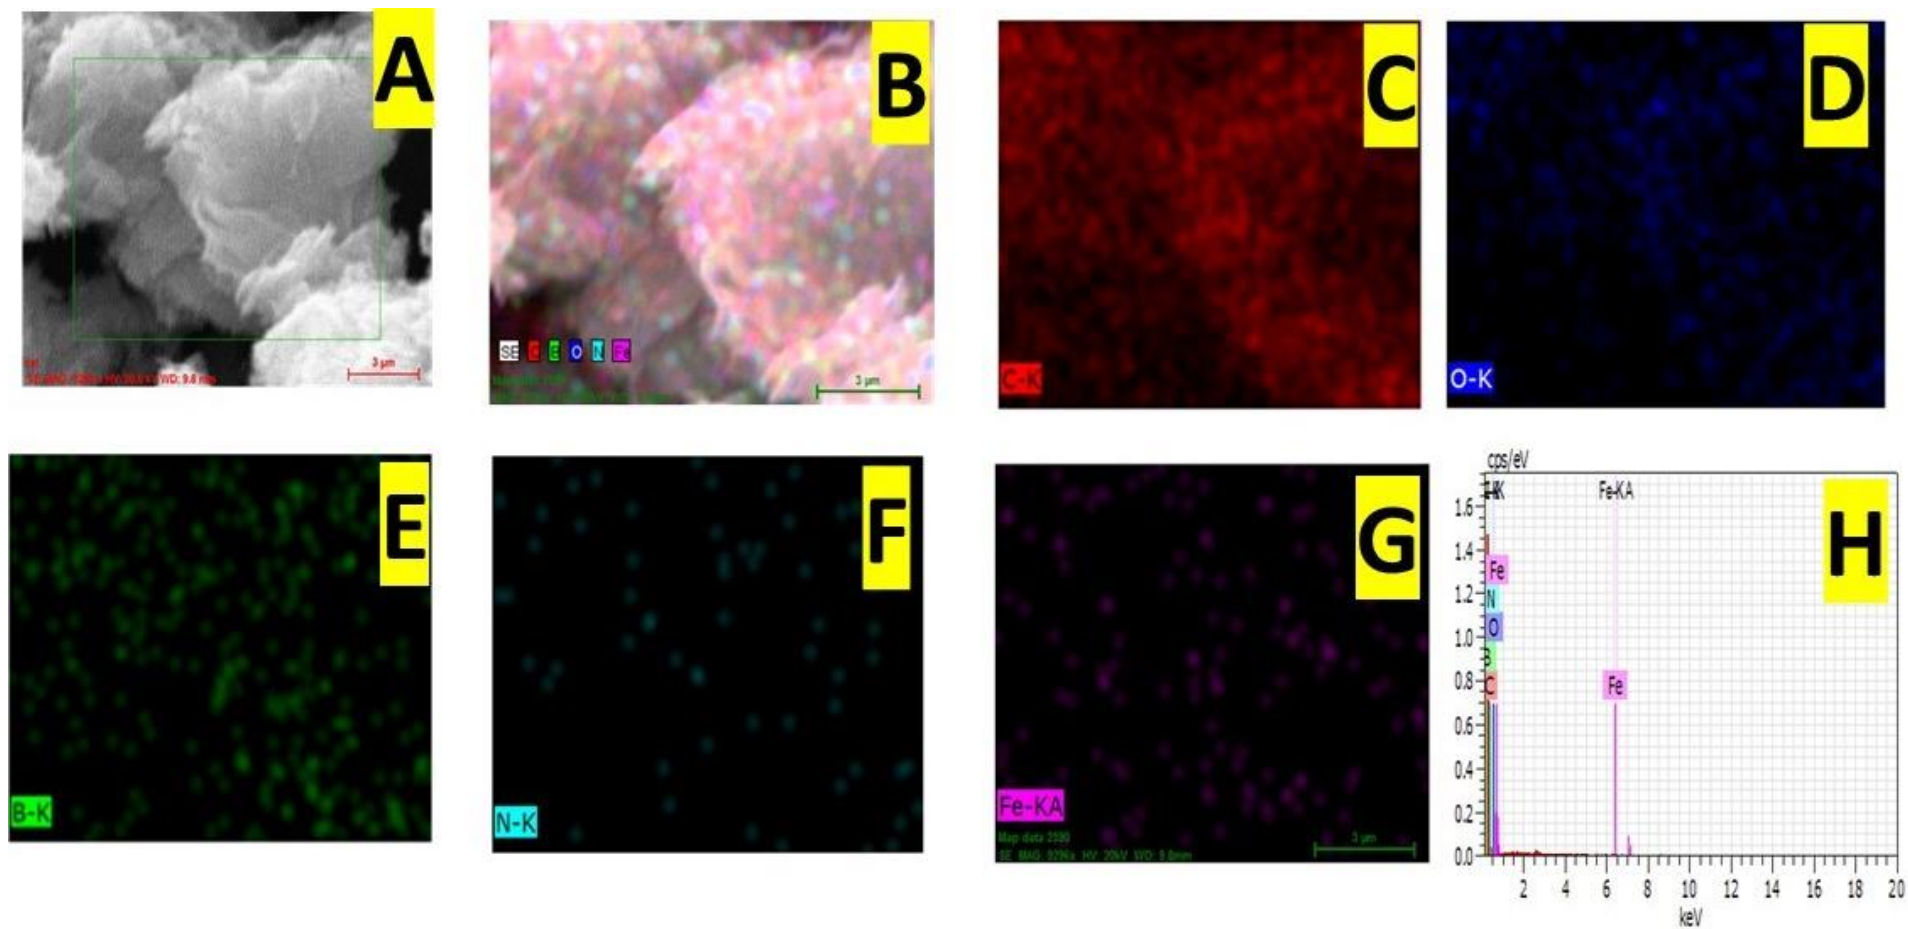

**Fig. S3** SEM mapping images (A-G) and EDAX spectrum (H) of FePc@B-RGO.

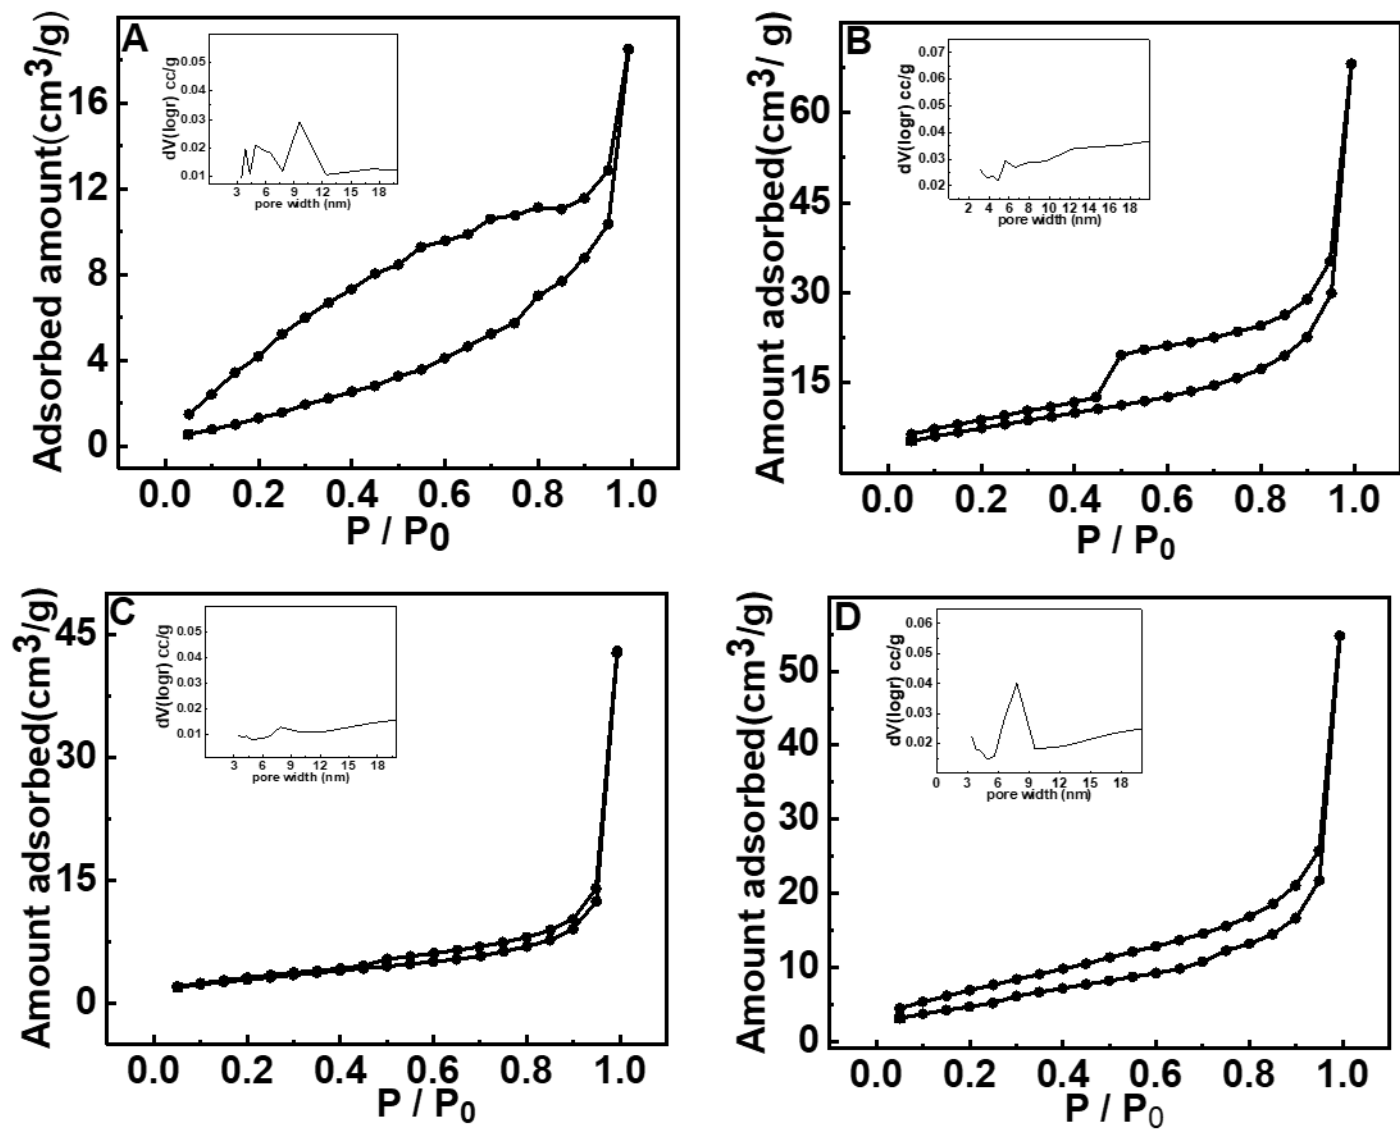

Fig. S4  $N_2$  adsorption-desorption isotherms of (A) RGO, (B) B-RGO, (C) FePc@RGO, and (D) FePc@B-RGO.



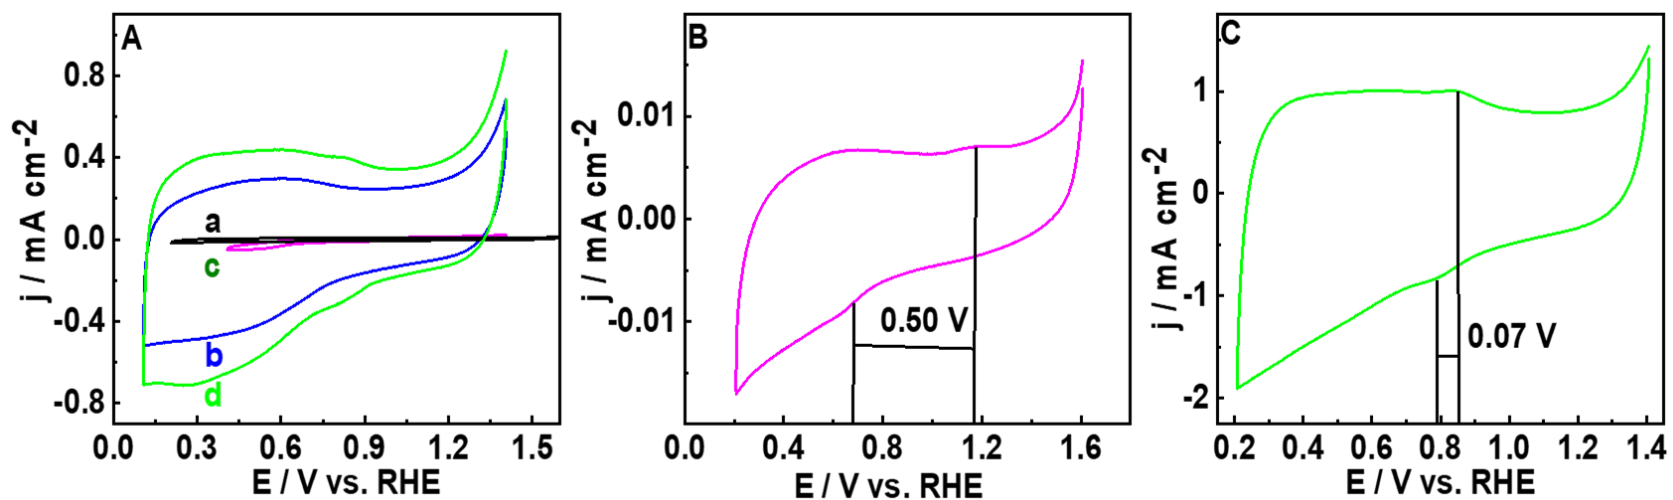

**Fig. S5** CV responses of (a) RGO, (b) B-RGO, (c) FePc@RGO, and (d) FePc@B-RGO in  $N_2$  saturated in 0.1 M KOH at  $20 \text{ mVs}^{-1}$  scan rate (A), CV responses of FePc@RGO (B), and FePc@B-RGO (C) recorded in  $N_2$  saturated 0.1 M KOH at  $50 \text{ mVs}^{-1}$  scan rate.

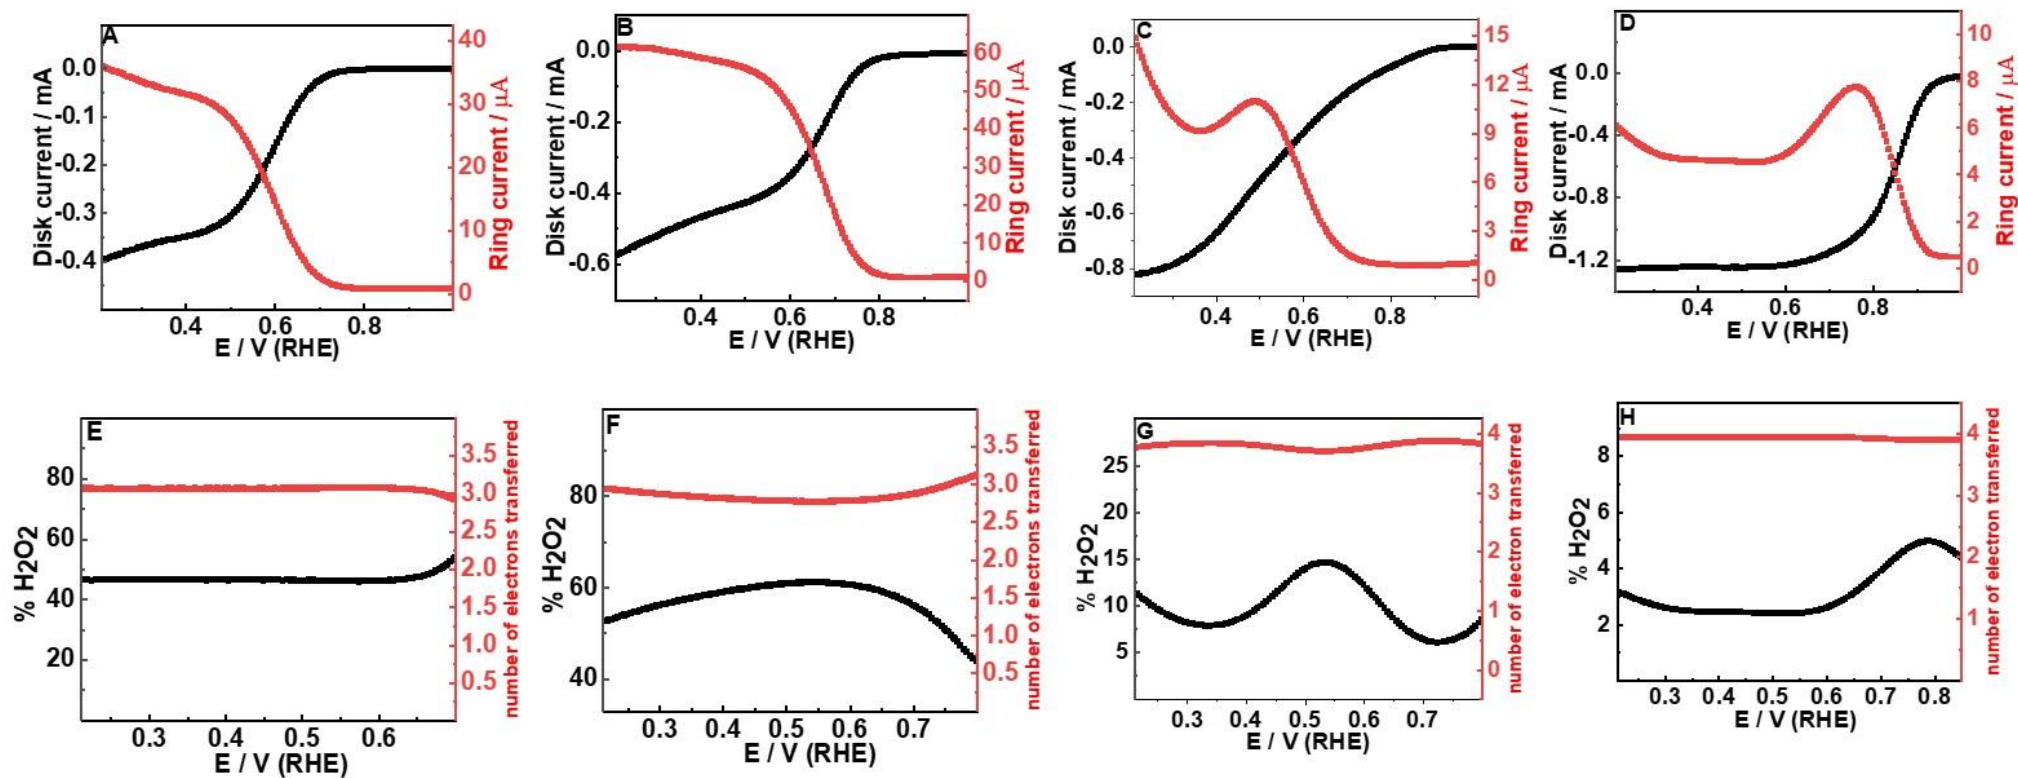

**Fig. S6** LSV response of RGO (A), B-RGO (B), FePc@RGO (C), and Pt/C (D) in basic medium showing the disc current in the potential window of 0.0 to 1.0 V vs. RHE and ring current at an applied potential of 1.5 V vs. RHE and the corresponding plots (E-H, respectively) showing the percentage of  $\text{H}_2\text{O}_2$  formed and the number of electrons transferred during the ORR.

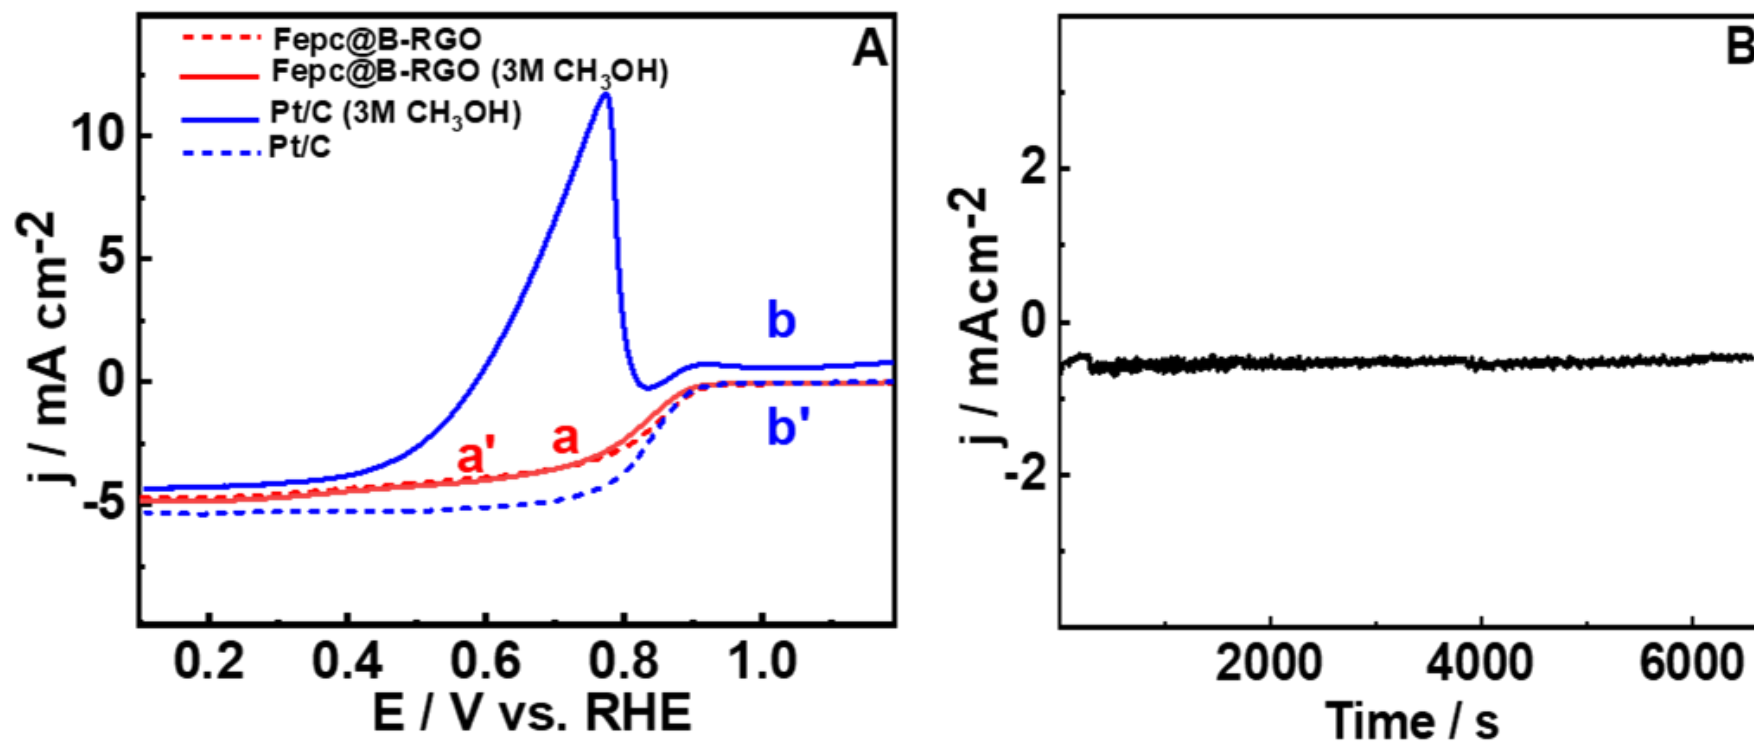

**Fig. S7** (A) Methanol tolerance study: LSV responses of FePc@B-RGO (a, a') and Pt/C (b, b') before (a', b') and after (a, b) the addition of 3.0 M methanol. (B) Stability study: Amperometry response of FePc@B-RGO for 7200 s at -0.5 V (vs. SCE).

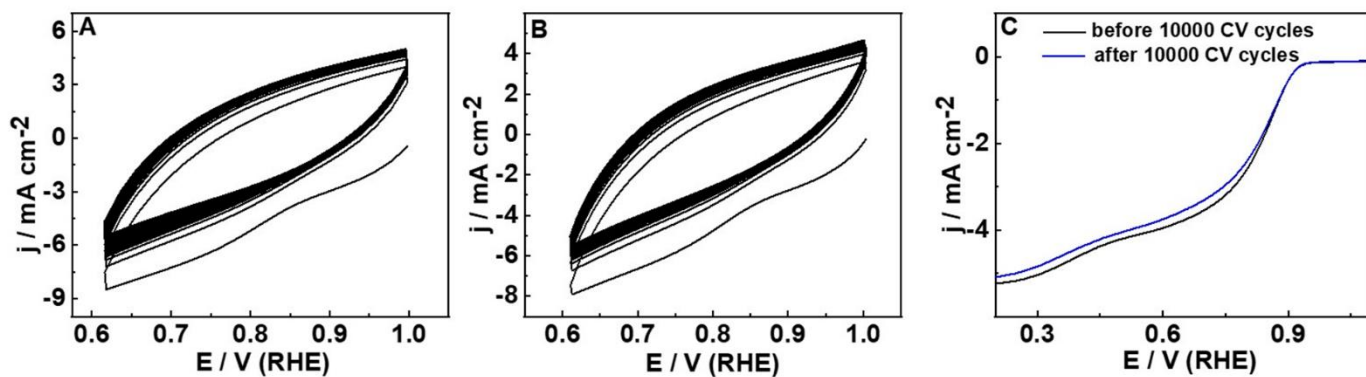

**Fig. S8** CV response of FePc@B-RGO catalyst in O<sub>2</sub>-saturated 0.1 M KOH for 7000 continuous cycles (A) and after a 10 min break, further 3000 CV cycles (B). LSV curves before and after 10,000 CV cycles (C) measured in O<sub>2</sub>-saturated 0.1 M KOH with a scan rate of 5 mVs<sup>-1</sup> and at a rotation rate of 1600 rpm.

**Table S1.** Comparison of the ORR efficiency of FePc@B-RGO with other catalysts in terms of onset potential

| <b>Material</b>                    | <b>Support material</b> | <b>E<sub>onset</sub> (RHE)</b> | <b>E<sub>1/2</sub> (RHE)</b> | <b>References</b> |
|------------------------------------|-------------------------|--------------------------------|------------------------------|-------------------|
| FePc <sup>A</sup>                  | RGO <sup>E</sup>        | 0.90 V                         | -                            | S7                |
| FePc                               | ERGO <sup>F</sup>       | 0.92 V                         | -                            | S8                |
| FePc                               | NGA <sup>G</sup>        | 0.92 V                         | -                            | S9                |
| FeTPPc <sup>B</sup>                | Gr <sup>H</sup>         | 0.88 V                         | -                            | S10               |
| TQFePc <sup>C</sup>                | RGO/CB <sup>I</sup>     | 0.88 V                         | -                            | S11               |
| FePc                               | CNT N <sup>J</sup>      | 0.95 V                         | 0.84 V                       | S12               |
| FePc(CP) <sub>4</sub> <sup>D</sup> | Gr <sup>H</sup>         | 0.81 V                         | -                            | S13               |
| FePc                               | B-RGO <sup>K</sup>      | 0.95 V                         | 0.85 V                       | This work         |
| FePc                               | MCN <sup>L</sup>        | 0.93 V                         | -                            | S14               |

<sup>A</sup> Iron phthalocyanine; <sup>B</sup> Iron(II) tetrapyriddyloxyphthalocyanine; <sup>C</sup> Tetra-β-(8-quinolinoxy) iron phthalocyanine; <sup>D</sup> Iron(III) tetracumylphenoxy phthalocyanine; <sup>E</sup> Reduced graphene oxide; <sup>F</sup> Electrochemical reduced graphene oxide; <sup>G</sup> Nitrogen-doped graphene aerogel; <sup>H</sup> Graphene; <sup>I</sup> Carbon black; <sup>J</sup> Nitrogen-doped carbon nanotubes; <sup>K</sup> Boron-doped reduced graphene oxide; <sup>L</sup> Mesoporous carbon nitride.

## References

- S1 P. K. Sonkar, K. Prakash, M. Yadav, V. Ganesan, M. Sankar, R. Gupta and D. K. Yadav, *J. Mater. Chem. A*, 2017, **5**, 6263–6276.
- S2 D. K. Singh, M. Natchimuthu Karuppusamy, A. Shrivastava, T. Palanisamy, I. Sinha and V. Ganesan, *ACS Catal.*, 2023, 4155–4167.
- S3 M. Yadav, V. Ganesan, R. Gupta, D. K. Yadav and P. K. Sonkar, *Microchem. J.*, 2019, **146**, 881–887.
- S4 C. Nethravathi, C. R. Rajamathi, M. Rajamathi, X. Wang, U. K. Gautam, D. Golberg and Y. Bando, *ACS Nano*, 2014, **8**, 2755–2765.
- S5 Y. Tian, C. Deng, Z. Sun, Y. Zhao, T. Tan, F. Yin and X. Wang, *Int. J. Electrochem. Sci.*, 2018, **13**, 3441–3451.
- S6 V. Thirumal, A. Pandurangan, R. Jayavel and R. Ilangovan, *Synth. Met.*, 2016, **220**, 524–532.
- S7 Y. Jiang, Y. Lu, X. Lv, D. Han, Q. Zhang, L. Niu and W. Chen, *ACS Catal.*, 2013, **3**, 1263–1271.
- S8 T. Taniguchi, H. Tateishi, S. Miyamoto, K. Hatakeyama, C. Ogata, A. Funatsu, S. Hayami, Y. Makinose, N. Matsushita, M. Koinuma and Y. Matsumoto, *Part. Part. Syst. Charact.*, 2013, **30**, 1063–1070.
- S9 H. Yin, C. Zhang, F. Liu and Y. Hou, *Adv. Funct. Mater.*, 2014, **24**, 2930–2937.
- S10 L. Cui, G. Lv and X. He, *J. Power Sources*, 2015, **282**, 9–18.
- S11 S. Wang and X. L. Song, *Dye. Pigment.*, 2021, **189**, 109254.
- S12 M. A. C. de Oliveira, V. C. A. Ficca, R. Gokhale, C. Santoro, B. Mecheri, A. D’Epifanio, S. Licoccia and P. Atanassov, *J. Solid State Electrochem.*, 2021, **25**, 93–104.

S13 L. Cui, G. Lv, Z. Dou and X. He, *Electrochim. Acta*, 2013, **106**, 272–278.

S14 D. K. Singh, V. Ganesan, D. K. Yadav and M. Yadav, *Langmuir*, 2020, **36**, 12202–12212.
